# Supplementary material for: Conservative versus Invasive Strategy in Elderly Patients with Non-ST-Elevation Myocardial Infarction: Insights from the International POPular Age Registry
Source: MDPI journal article supplement (doi:10.3390/jcm12175450), 2023-08-22
Supplement: s1 [file s1]

**Table S1.** Univariate and Multivariate Cox regression models for adjustment for confounders for all cardiovascular outcomes. Differences in outcomes between conservative-management and invasive-management were calculated using Cox proportional-hazard models. Multiple clinically relevant baseline variables were analyzed in an univariate regression analysis. Variables with a p-value <0.05 were assessed in a multivariate model. The final model included only those characteristics with a significant interaction (p < 0.05) in the multivariate analysis.

| Endpoints       | Variables tested in univariate regression            | Significant variables in multivariate regression model |
|-----------------|------------------------------------------------------|--------------------------------------------------------|
| MACE            |                                                      | Age, LVEF <50%, Killip class >2, DM, ST-depression     |
| NACE            | Age, gender, prior MI, HF, CKD, AF, DM, COPD,        | Age, CKD, Killip class >2, DM, ST-depression           |
| All-cause death | HT, history of smoking, hypercholesterolemia,        | Age, LVEF <50%, Killip class >2                        |
| CV death        | positive family history, LVEF <50%, Killip class >2, | Age, LVEF <50%, Killip class >2                        |
| Recurrent ACS   | ST-depression, treatment with P2Y12-inhibitors,      | Diabetes, hypercholesterolemia                         |
| Stroke          | treatment with OAC                                   | Peripheral artery disease, hypertension                |
| BARC 3 or 5     |                                                      | -                                                      |
| BARC 2, 3 or 5  |                                                      | HT                                                     |

ACS = acute coronary syndrome; AF = atrial fibrillation; BARC = Bleeding Academic Research Consortium; COPD = chronic obstructive pulmonary disease; CV = cardiovascular death; DM = diabetes mellitus; HF = heart failure; HT = hypertension; LVEF = left ventricular ejection fraction; MACE = major adverse cardiovascular events; MI = myocardial infarction; NACE = Net adverse clinical events; OAC = oral anticoagulation.

**Table S2.** Coronary lesions across the different treatment groups.

| <b>Vessel disease</b> | <b>OMT<br/>(N = 392)</b> | <b>Only CAG<br/>(N = 270)</b> | <b>PCI with stent<br/>(N = 417)</b> | <b>CABG<br/>(N = 111)</b> |
|-----------------------|--------------------------|-------------------------------|-------------------------------------|---------------------------|
| No VD                 |                          | 90 (33%)                      | 0                                   | 0                         |
| 1-VD                  |                          | 48 (18%)                      | 123 (30%)                           | 5 (5%)                    |
| 2-VD                  |                          | 32 (12%)                      | 113 (27%)                           | 20 (18%)                  |
| 3-VD                  |                          | 73 (27%)                      | 104 (25%)                           | 74 (67%)                  |
| Graft dysfunction     |                          | 22 (8%)                       | 21 (5%)                             | 2 (2%)                    |
| VD unknown            | 392 (100%)               | 5 (2%)                        | 52 (13%)                            | 10 (9%)                   |

CABG = coronary artery bypass grafting; CAG = coronary angiography; OMT = optimal medical therapy; PCI = percutaneous coronary intervention; VD = vessel disease.

**Table S3.** Medical therapy at discharge

|                                            | <b>Total<br/>(N = 1190)</b> | <b>Conservative group<br/>(N = 392)</b> | <b>Invasive group<br/>(N = 798)</b> |
|--------------------------------------------|-----------------------------|-----------------------------------------|-------------------------------------|
| Triple therapy                             | 77 (6%)                     | 10 (3%)                                 | 67 (8%)                             |
| DAPT*                                      | 655 (55%)                   | 157 (42%)                               | 415 (59%)                           |
| DAPT with<br>clopidogrel                   | 219 (38%)                   | 77 (49%)                                | 142 (34%)                           |
| DAPT with ticagrelor                       | 348 (60%)                   | 80 (51%)                                | 268 (65%)                           |
| P2Y <sub>12</sub><br>inhibitor+(N)OAC      | 124 (10%)                   | 54 (14%)                                | 70 (9%)                             |
| Aspirin+(N)OAC                             | 33 (3%)                     | 8 (2%)                                  | 25 (3%)                             |
| Monotherapy aspirin                        | 93 (8%)                     | 36 (9%)                                 | 57 (7%)                             |
| Monotherapy P2Y <sub>12</sub><br>inhibitor | 71 (6%)                     | 35 (9%)                                 | 36 (5%)                             |
| Monotherapy (N)OAC                         | 41 (3%)                     | 18 (5%)                                 | 23 (3%)                             |
| No antithrombotic<br>therapy               | 11 (<1%)                    | 6 (2%)                                  | 5 (<1%)                             |
| Beta-blocker                               | 861 (72%)                   | 254 (66%)                               | 607 (76%)                           |
| ACE-inhibitor                              | 569 (48%)                   | 151 (39%)                               | 418 (52%)                           |
| Angiotensin II<br>inhibitor                | 212 (18%)                   | 58 (15%)                                | 154 (19%)                           |
| Calcium antagonist                         | 306 (26%)                   | 80 (21%)                                | 226 (28%)                           |
| Cholesterol inhibitor                      | 955 (80%)                   | 261 (67%)                               | 694 (87%)                           |
| Diuretics                                  | 365 (31%)                   | 139 (36%)                               | 226 (28%)                           |
| Anti-diabetics                             | 245 (21%)                   | 84 (22%)                                | 161 (20%)                           |
| Aldosterone<br>antagonist                  | 96 (8%)                     | 39 (10%)                                | 57 (7%)                             |
| PPI                                        | 888 (75%)                   | 246 (63%)                               | 642 (81%)                           |

Data are n (%). Triple therapy consists of aspirin, a P2Y<sub>12</sub> inhibitor and a (non-vitamin-k) oral anticoagulant; ACE = Angiotensin-converting enzyme; DAPT = dual antiplatelet therapy consisting of aspirin and a P2Y<sub>12</sub> inhibitor; (N)OAC = (non-vitamin-k-antagonist) oral anticoagulant; PPI = proton pump inhibitor. \*In this analysis, patients who were also included in the POPular AGE trial were excluded (total population, N = 1079, of which 372 and 702 in the conservative and invasive group, respectively.)

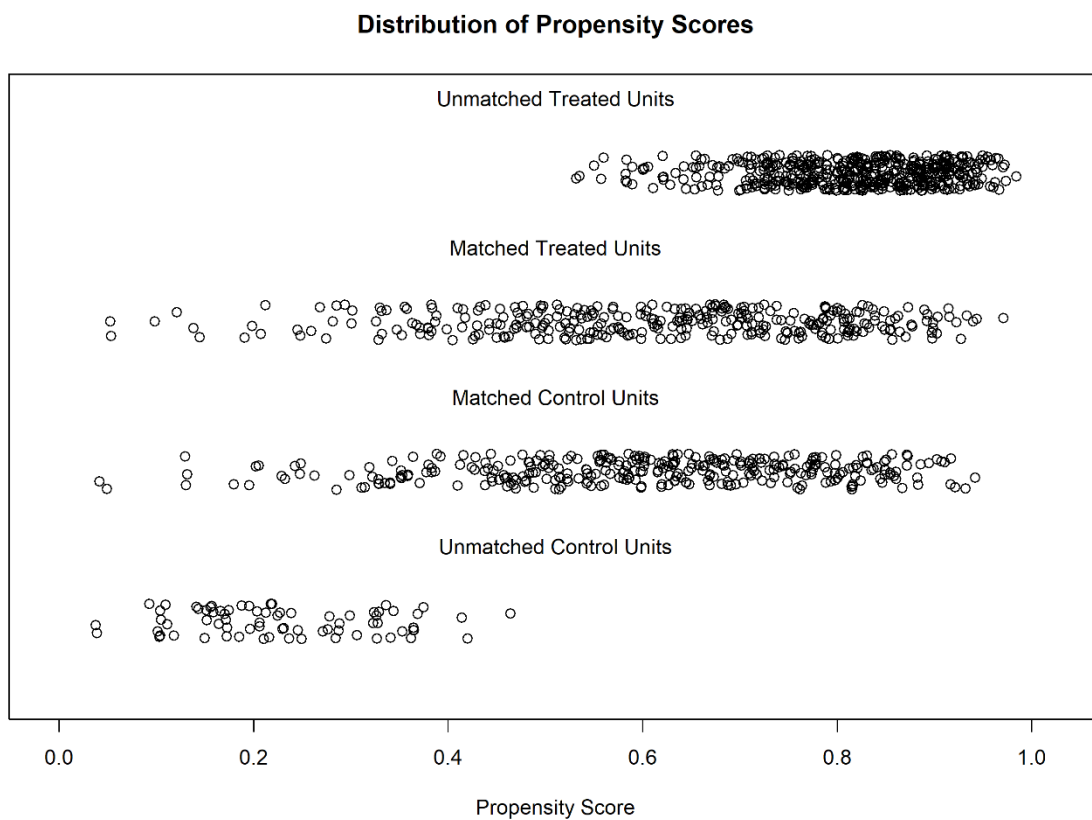

**Figure S1.** Distribution of propensity scores between treated (invasive managed) and control (conservative managed) patients.

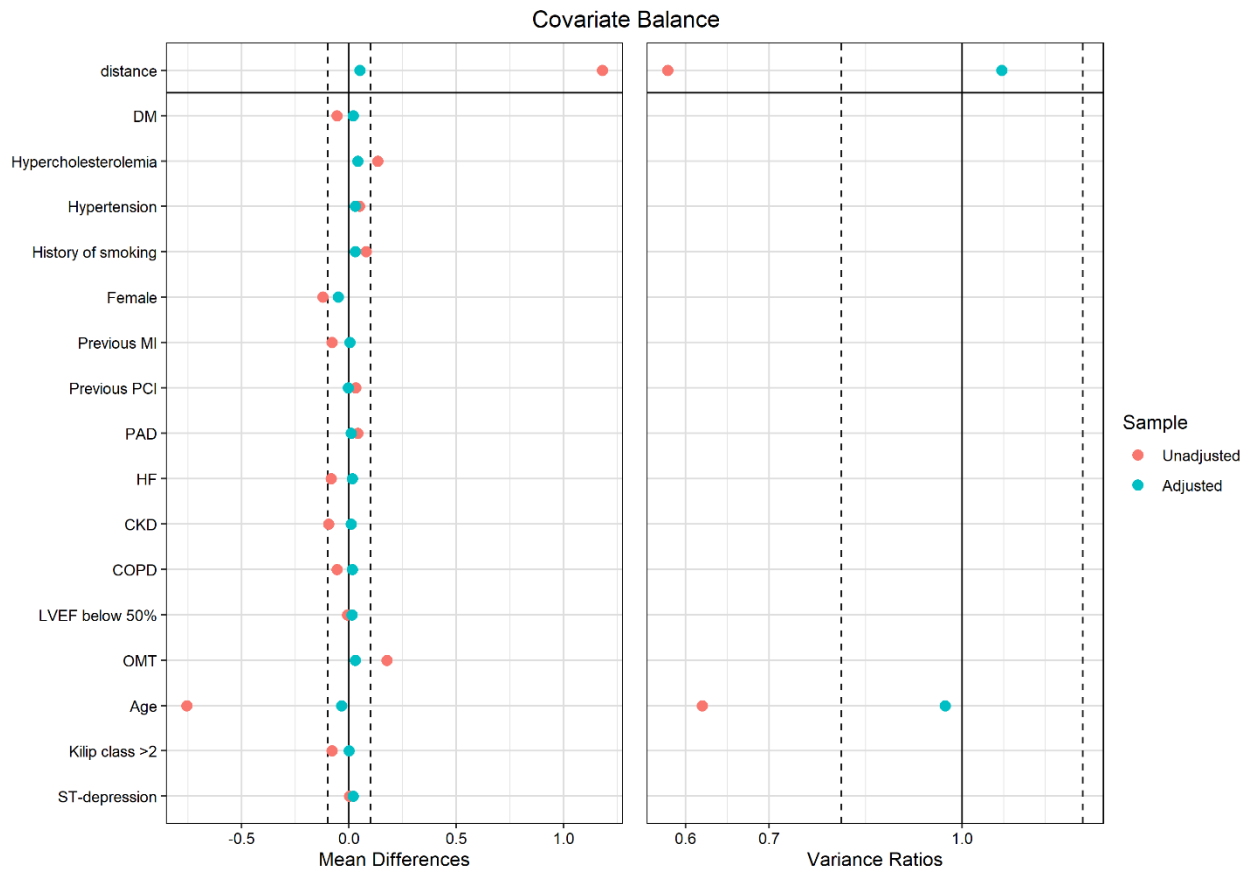

**Figure S2.** Balance for each covariates used in the propensity score matching analysis.
